1 Running Head : Effects of nutrient enrichment and alien snails on alien and native plants

2

3 **Opposite effects of nutrient enrichment and herbivory by an alien snail on growth of an**  
4 **invasive macrophyte and native macrophytes**

5 Yimin Yan<sup>1,2,3†</sup>, Ayub M.O. Oduor<sup>4†</sup>, Feng Li<sup>3</sup>, Yonghong Xie<sup>3</sup>, Yanjie Liu<sup>1,3,5\*</sup>

6 <sup>1</sup>*Key Laboratory of Wetland Ecology and Environment, Northeast Institute of Geography and*  
7 *Agroecology, Chinese Academy Sciences, Changchun 130102, China*

8 <sup>2</sup>*University of Chinese Academy of Sciences, Beijing 100049, China*

9 <sup>3</sup>*Dongting Lake Station for Wetland Ecosystem Research, Institute of Subtropical Agriculture,*  
10 *Chinese Academy of Sciences, Changsha, 410125, China*

11 <sup>4</sup>*Department of Applied Biology, Technical University of Kenya, P. O. Box 52428-00200,*  
12 *Nairobi, Kenya*

13 <sup>5</sup>*Ecology, Department of Biology, University of Konstanz, 78464 Konstanz, Germany*

14

15 †Yimin Yan and Ayub M.O. Oduor contributed equally to the work.

16

17 \*Email of corresponding author: liuyanjie@iga.ac.cn +86 431 82536096

18 **Abstract**

19 Human-mediated introduction of plant and animal species into biogeographic ranges where they  
20 did not occur before has been so pervasive globally that many ecosystems are now co-invaded by  
21 multiple alien plant and animal species. Although empirical evidence of invaders modifying  
22 recipient ecosystems to the benefit of other aliens is accumulating, these interactions remain  
23 underexplored and underrepresented in heuristic models of invasion success. Many freshwater  
24 ecosystems are co-invaded by aquatic macrophytes and mollusks and at the same time  
25 experience nutrient enrichment from various sources. However, studies are lacking that test how  
26 nutrient enrichment and co-invasion by alien herbivores and plant species can interactively affect  
27 native plant communities in aquatic habitats. To test such effects, we performed a freshwater  
28 mesocosm experiment in which we grew a synthetic native macrophyte community of three  
29 species under two levels of nutrient enrichment (enrichment vs. no-enrichment) treatment and  
30 fully crossed with two levels of competition from an invasive macrophyte *Myriophyllum*  
31 *aquaticum* (competition vs. no-competition), and two levels of herbivory by an invasive snail  
32 *Pomacea canaliculata* (herbivory vs. no-herbivory) treatments. Results show that herbivory by  
33 the invasive snail enhanced above-ground biomass yield of the invasive macrophyte. Moreover,  
34 the invasive herbivore preferentially fed on biomass of the native macrophytes over that of the  
35 invasive macrophyte. However, nutrient enrichment reduced above-ground biomass yield of the  
36 invasive macrophyte. Our results suggest that eutrophication of aquatic habitats that are already  
37 invaded by *M. aquaticum* may slow down invasive spread of the invasive macrophyte. However,  
38 herbivory by the invasive snail *P. canaliculata* may enhance invasive spread of *M. aquaticum* in  
39 the same habitats. Broadly, our study underscores the significance of considering several factors  
40 and their interaction when assessing the impact of invasive species, especially considering that

41 many habitats experience co-invasion by plants and herbivores and simultaneously undergo  
42 various other disturbances including nutrient enrichment.

43

44 **Key words:** Biological invasion, alien species, non-native plants, herbivory, shallow lake,  
45 invasion debt, early establishment, invasional-meltdown.

46

## 47 **INTRODUCTION**

48 Human-mediated introduction of plant and animal species into biogeographic ranges where they  
49 did not occur before has been so pervasive globally that many ecosystems are now co-invaded by  
50 multiple alien plant and animal species (Dawson et al. 2017). The invasive alien species could  
51 interact with native species as well as with each other (Green et al. 2011). Invasive species often  
52 have negative interactions with native species through herbivory, parasitism, predation, and  
53 competition, which often impacts negatively on abundance and diversity of native plant and  
54 animal species and disrupt ecosystem processes (Mack et al. 2000, Wikelski et al. 2004, Parker  
55 et al. 2006, Oduor et al. 2010, Vilà et al. 2011, Ricciardi et al. 2013, Schirmel et al. 2016,  
56 Stephens et al. 2019), although there are instances where invasive species can facilitate native  
57 species diversity (Callaway et al. 2000, Oduor et al. 2018). However, far fewer studies have  
58 investigated effects of invader-invader interactions on attributes of recipient communities and  
59 ecosystem processes (O'Loughlin and Green 2017, Ricciardi et al. 2021).

60 Complex invader-invader interactions can lead to a wide range of outcomes for native  
61 communities and ecosystem processes (Grosholz 2005). Negative invader-invader interactions  
62 through competition and/or predation can minimize joint effects of invasive species on native  
63 biota (Ross et al. 2004). In other cases, invasive species do not have net effect on each other  
64 (Cope and Winterbourn 2004). Invasive species can also facilitate each other's establishment,  
65 dominance, spread and ecological impacts, in accordance with the invasional meltdown  
66 hypothesis (Simberloff and Von Holle 1999, Ricciardi 2001, Best and Arcese 2009). Although  
67 empirical evidence of invaders modifying recipient ecosystems to the benefit of other aliens is  
68 accumulating, these interactions remain underexplored and underrepresented in heuristic models  
69 of invasion success (O'Loughlin and Green 2017). The complex interactions among invasive

70 species warrant experimental research to identify how invasive species interact and their  
71 consequences for native communities and ecosystems (Johnson et al. 2009). Such studies may be  
72 particularly informative in aquatic ecosystems where experimental approaches to understanding  
73 the multi-scale effects of invasive species have historically been underrepresented compared to  
74 terrestrial ecosystems (Johnson et al. 2009, Havel et al. 2015). For most aquatic invaders, our  
75 knowledge regarding specific ecological impacts remains limited particularly at scales extending  
76 beyond the population level (Stephens et al. 2019). When ecological changes are associated with  
77 an aquatic invader, the direct and indirect mechanisms responsible are often unknown or  
78 confounded by other forms of environmental change, precluding identification of the invader's  
79 role in observed shifts (Stephens et al. 2019). This situation may severely undermine our ability  
80 to forecast how future increases or decreases in invader abundances are likely to influence  
81 ecosystem conditions (Strayer et al. 2006).

82 It has been suggested that herbivory reinforces competition between plant species, which in  
83 turn diminishes the chance of coexistence among species by favoring species that are better  
84 competitors (Gurevitch et al. 2000). However, in spite of this prediction, in invasion ecology, the  
85 interactive effects of herbivory and competition on plant communities have been rarely assessed  
86 (Suwa and Louda 2012, Li et al. 2014, Zhang et al. 2018) as studies have typically assessed  
87 single biotic mechanisms (Santamaría et al. 2021). This hinders accurate estimation of the  
88 relative significance of competition and herbivory in structuring plant communities in invaded  
89 habitats, particularly in aquatic ecosystems that remain understudied (Santamaría et al. 2021).

90 Many freshwater ecosystems are co-invaded by aquatic macrophytes and mollusks  
91 (Tricarico et al. 2016) and at the same time experience nutrient enrichment from various sources  
92 including agricultural activities in watersheds (Havel et al. 2015). However, few studies have

93 investigated whether effects of the multiple invaders are additive, synergistic, or antagonistic  
94 (Havel et al. 2015). Observations from field surveys that were conducted mostly in terrestrial  
95 ecosystems have found that invasive plant species generally thrive in nutrient-rich habitats (Funk  
96 and Vitousek 2007, Buckley and Catford 2016). Factorial experiments have also found that  
97 nutrient enrichment favours growth performance of invasive plant species over native plants  
98 (González et al. 2010, Liu et al. 2017). These findings generally support the suggestion that  
99 nutrient enrichment may promote plant invasion (Davis et al. 2000, Dawson et al. 2012). Theory  
100 predicts that herbivores that share evolutionary history with particular host plants will have a  
101 lower feeding preference for those plants than for plants with which they have not co-evolved  
102 (Colautti et al. 2004, Parker et al. 2006). This prediction is premised on the idea that host plants  
103 that do not share evolutionary history with herbivores have not evolved strong defences against  
104 the herbivores. Indeed, a previous synthesis of 11 studies found support for the prediction (Oduor  
105 et al. 2010). However, studies are lacking that test how nutrient enrichment and co-invasion by  
106 alien herbivores and alien plant species can interactively affect native plant communities in  
107 aquatic habitats.

108 Some aquatic habitats in China have been co-invaded by the apple snail *Pomacea*  
109 *canaliculata* and a macrophyte *Myriophyllum aquaticum* (Qiu and Kwong 2009), which are both  
110 native to South America (Hayes et al. 2008, Gillard et al. 2017), and co-occur in large areas of  
111 their native region (for details see the GBIF database; [www.gbif.org](http://www.gbif.org)). *Pomacea canaliculata* is  
112 one of the 100 malignant invasive species in the world (Lowe et al. 2000), which has become  
113 established in many tropical East Asian countries (Hayes et al. 2008). It often feeds on  
114 submerged and emergent macrophytes (Qiu and Kwong 2009) and causes economic losses and  
115 alters wetland ecosystems in its introduced region (Carlsson et al. 2004, Hayes et al. 2008). On

116 the other hand, the macrophyte *M. aquaticum* was initially introduced as a wetland ornamental  
117 plant and sewage treatment plant (Cui et al. 2021), but spread quickly and occupied large  
118 wetlands and shallow water areas later (i.e. become invasive; Wang et al. 2016). Separate studies  
119 have shown that nutrient enrichment can enhance growth of the invasive macrophyte (Xie et al.  
120 2010, Shen et al. 2019, Zhang et al. 2021). Studies have also shown that the invasive snail  
121 exhibits feeding preference for plants with lower defences (Qiu and Kwong 2009). Furthermore,  
122 the invasive plants often have higher resistance to generalist herbivore over native plants due to  
123 their novel allelochemicals (Schaffner et al. 2011, Qi et al. 2020). Therefore, the aquatic habitats  
124 offer a good system to test the combined effects of nutrient enrichment and co-invasion by alien  
125 herbivores and alien plant species on native plant communities.

126 Using a mesocosm experiment, we experimentally investigated the individual and combined  
127 effects of nutrient enrichment and co-invasion by the invasive herbivore *P. canaliculata* and the  
128 invasive plant *M. aquaticum* on biomass yield of a synthetic community of three native  
129 macrophyte species. Specifically, we tested the following predictions: (1) Nutrient enrichment  
130 enhances growth of the invasive macrophyte more than that of native macrophytes; (2) the  
131 invasive herbivore consumes more biomass of the native macrophyte than that of the invasive  
132 macrophyte because the invasive macrophyte has with a stronger defence against the herbivore,  
133 while the native macrophytes are evolutionarily naïve to the herbivore; (3) Preferential feeding  
134 by the invasive herbivore on competitor native macrophytes confers growth advantage to the  
135 invasive macrophyte.

## 136 MATERIAL AND METHODS

### 137 *Study location and species*

138 The study was conducted in a mesocosm of the Dongting Lake Wetland Ecosystem Observation  
139 and Research Station (29.30°N, 150.74°E) of the Chinese Academy of Sciences in Yueyang,  
140 China. The local climate is subtropical. The mesocosm comprises a fixed steel structure, with a  
141 transparent acrylic plate placed on the top. Light and temperature conditions in the mesocosm are  
142 similar to that of the ambient conditions. The roof of the mesocosm structure is covered with a  
143 waterproof nylon bag to keep out rain water. The mesocosm was subdivided into 128 individual  
144 ponds that each measured 1 m<sup>3</sup>.

145 We constructed a three-species native macrophyte community using perennial herbaceous  
146 species that commonly occur in the local wetland habitat *Vallisneria natans*, *Hydrilla verticillata*,  
147 and *Myriophyllum spicatum*. To simulate natural invasion of the native macrophyte community,  
148 we introduced *M. aquaticum* to the submerged native community. We procured seedlings of all  
149 the four macrophyte species from an aquatic plant-producing company (Guangzhou Beishanshui  
150 Ecological Technology Co., Ltd, Ezhou, China). The seedlings were kept in pond water until use  
151 in the experimental set up described below. On 5<sup>th</sup> July 2020, we collected individuals of the  
152 apple snail from a pond around the research station. The snails were maintained in pond water  
153 with similar conditions as the experimental mesocosm for two weeks where they were fed daily  
154 with leaf tissues of the four macrophyte species that were used in the current study. Water in the  
155 pond that harbored the snails was changed daily.

### 156 *Experimental design*

157 On 3<sup>rd</sup> June 2020, we added soil into each of the 128 ponds to a depth of 15 cm. The soil was  
158 obtained from the experimental station and was sifted to remove stones and plant and animal



159 debris. We used terrestrial topsoil instead of lake bottom silt to avoid the risk of undesired  
160 macrophytes emerging from an aquatic plant seed bank. Immediately after adding the soil, we  
161 added 150 L of groundwater to each pond. Two days later, we transplanted into the ponds  
162 similar-sized stem cuttings of all the experimental plant species except for *V. natans* that was  
163 propagated with seedlings. To facilitate transplanting, we placed a metallic framework (100 cm ×  
164 100 cm) of 36 grids (each grid measured 15 cm × 15 cm) in the center of each pond and then  
165 randomly placed 12 individual stem cuttings or seedlings of each native species in 12 grids to  
166 create a three-species native macrophyte community per pond.

167 Using the 128 ponds that all planted with native macrophyte community, we employed a  
168 fully crossed factorial experiment with two levels of competition from an invasive macrophyte  
169 *Myriophyllum aquaticum* (competition vs. no-competition), two levels of nutrient enrichment  
170 (enrichment vs. no-enrichment) treatment, and two levels of herbivory by an invasive snail  
171 *Pomacea canaliculata* (herbivory vs. no-herbivory) treatments. To simulate invasion of an  
172 established native macrophyte community by the invasive macrophyte *M. aquaticum*, we  
173 introduced 12 individuals of *M. aquaticum* haphazardly into half of the 128 ponds (i.e. 64 ponds;  
174 **Fig.1**) on 5<sup>th</sup> June 2020. After transplanting all plants, we removed the metal frame from the  
175 ponds.

176 On 28<sup>th</sup> June 2020, we added additional 450 L of water to attain a water depth of 45 cm,  
177 and immediately thereafter imposed a nutrient enrichment treatment. We added 4.5 g of Peters  
178 Professional® water-soluble fertilizer (Total Nitrogen - 20%; Available Phosphate - 20%;  
179 Soluble Potash - 20%; Magnesium - 0.05%; Boron - 0.0125%; Copper - 0.0125%; Iron - 0.05%;  
180 Manganese - 0.025%; Molybdenum - 0.005%; Zinc - 0.025%) to a half of the ponds (i.e., 64  
181 ponds). The fertilizer was dissolved in five liters of water and then gradually released into the

182 pond to ensure its even distribution across the pond. As a control for nutrient enrichment, we  
183 added five liters of water to the other 64 ponds. On 13<sup>th</sup> July, 2020, we introduced six  
184 similar-sized (diameter: 2.5 to 3.5 cm) individuals of the apple snail into each pond for a half the  
185 ponds. We let only the introduced snails to feed; hence, we cleared the pond of snail eggs every  
186 three days for the two-week period when herbivory treatment was imposed to prevent a new  
187 generation of snails from feeding on the macrophytes. During the first week, three dead snails  
188 from three ponds were replaced.

189 On 2<sup>nd</sup> August, 2020, we ended the experiment when some individuals of *M. spicatum*  
190 started to flower. We removed all the apple snails and then harvested aboveground biomass of  
191 the experimental macrophytes separately for each pond. Immediately after harvest, the plants  
192 were wiped dry with absorbent paper and dried to a constant biomass in an oven at 65 °C for 72  
193 hours. Biomass was harvested from 125 ponds as three ponds were infested by an insect that  
194 consumed all the aboveground biomass, and hence were omitted from a statistical analysis.  
195 Weight of the dry biomass was then taken to the nearest 0.1g.

196 To test whether the invasive snail *P. canaliculata* had a lower feeding preference for the  
197 invasive macrophytes than the native macrophytes, we set up a feeding bioassay on 7<sup>th</sup> July,  
198 2020. Ten grams of above-ground parts (including leaves and stems) of each macrophyte species  
199 was placed in a conical flask that had been filled with 1L water. Then two individuals of *P.*  
200 *canaliculata* of the same size (diameter: 2.5cm) were added into each flask. The flask was  
201 covered with a gauze on the top part to prevent escape of the snails and ingress of any unwanted  
202 herbivore. As a control, we set up flasks with the same amount of water and above-ground  
203 biomass of the individual macrophyte species but without the snail being introduced. Each  
204 treatment and control was replicated three times. All flasks were kept in a room at a constant

205 temperature (27 °C) for 24h after which the experiment was stopped. Immediately at the end of  
206 the feeding bioassay, we removed all the snails and dried the plant biomass at 65 °C for 72 hours  
207 and took measurements of the individual biomass samples per flaks per herbivory treatment.  
208 The biomass records were used in the statistical tests described below.

### 209 ***Statistical analysis***

210 To test the main and interactive effects of herbivory by the invasive snail *P. canaliculata*,  
211 competition by the invasive macrophyte *M. aquaticum*, and nutrient enrichment on growth  
212 performance of the native macrophyte community, we performed a three-way ANOVA.  
213 Aboveground biomass of the native macrophyte community in each pond was specified as  
214 dependent variable. The independent variables included main and all possible three-way, and  
215 two-way interactive effects of nutrient enrichment (enrichment vs. no-enrichment), competition  
216 from *M. aquaticum* (competition vs. no-competition), and herbivory by *P. canaliculata*  
217 (herbivory vs. no-herbivory). The above-ground biomass data were log-transformed to assure  
218 normality of residuals and homogeneity of variance.

219 To test the main and interactive effects of herbivory by the invasive snail *P. canaliculata* and  
220 nutrient enrichment on absolute and relative growth performance of the invasive macrophyte, we  
221 conducted a two-way ANOVA using a subset of data from ponds that were invaded by *M.*  
222 *aquaticum*. The absolute above-ground biomass of *M. aquaticum* and the proportional  
223 above-ground biomass of *M. aquaticum* relative to the whole community above-ground biomass  
224 (i.e. an indicator of relative growth performance of *M. aquaticum*) were specified as dependent  
225 variables. The independent variables included main and two-way interactive effects of nutrient  
226 enrichment and herbivory by the invasive snail. To assure normality of residuals and  
227 homogeneity of variance, the absolute above-ground biomass and the relative above-ground

228 biomass of the invasive macrophyte were log-transformed.

229 We also performed a two-way ANOVA for the feeding bioassay experiment to test the main  
230 and interactive effects of herbivory by the invasive snail and plant species identity on the  
231 biomass of above-ground parts. In the ANOVA, amount of biomass of each of the four  
232 individual macrophyte species was treated as a dependent variable, while herbivory treatment  
233 (herbivory *vs* no-herbivory) and species identity (*M. aquaticum*, *V. natans*, *H. verticillata* and *M.*  
234 *spicatum*) were specified as an independent variable. Then, we did a post-hoc analysis with  
235 Tukey's Test to test whether the invasive snail had a lower preference for the invasive  
236 macrophyte than for the native macrophytes. All analyses were performed in R 4.0.3 (R Core  
237 Team 2020).

238

239 **RESULTS**

240 Nutrient enrichment increased the above-ground biomass of the native macrophyte community  
241 (**Fig. 2; Table S1**). However, herbivory by the invasive snail significantly decreased the  
242 above-ground biomass of the native macrophyte community (**Fig. 2; Table S1**). The negative  
243 effect of herbivory by the snail was stronger when the macrophyte community was grown under  
244 nutrient-enrichment treatment than in the absence of nutrient enrichment (**Fig. 2; significant N ×**  
245 **H effects in Table S1**).

246 Herbivory by the invasive snail tended to decrease above-ground biomass of the invasive  
247 macrophyte (**Fig. 3a**; marginal significant effect [ $p = 0.083$ ] in **Table S2**). However, herbivory  
248 by the invasive snail significantly increased proportional biomass of the invasive macrophyte in  
249 the invaded community (**Fig. 3b; Table S2**). Although nutrient enrichment did not affect the  
250 absolute above-ground biomass of the invasive macrophyte, nutrient enrichment decreased the  
251 proportional above-ground biomass of the invader (**Fig. 3b; Table S2**).

252 In the feeding assay, herbivory by the invasive snail reduced significantly biomass of two of  
253 the native macrophytes *H. verticillata* and *V. natans* (**Fig. 4; Table S3**). However, biomass of a  
254 native macrophyte *M. spicatum* and the invader *M. aquaticum* was not reduced significantly by  
255 herbivory (**Fig. 4**).

256 **DISCUSSION**

257 In line with the invasional meltdown hypothesis, we found that herbivory by the invasive snail  
258 may enhance the dominance of the invasive macrophyte in the invaded communities. On the  
259 other hand, our study does not support the prediction that nutrient enrichment may enhance  
260 invasion by the invasive macrophyte, although invasive plant species have been shown to thrive  
261 in nutrient-rich habitats in many studies (Funk and Vitousek 2007, Seabloom et al. 2015). These  
262 results generally underscore the significance of considering several factors and their interaction  
263 when assessing the impact of invasive species, especially considering that many habitats  
264 experience co-invasion by plants and herbivores (Green et al. 2011, Dawson et al. 2017) and  
265 simultaneously undergo various other disturbances including human-induced nutrient enrichment  
266 (Bobbink et al. 2010).

267 Alien herbivores can facilitate invasion by alien plant species through preferential feeding  
268 on herbivory-intolerant native plants in the invaded communities (Hobbs 2001, Parker et al. 2006,  
269 Oduor et al. 2010). Indeed our results show that the invasive snail consumed more biomass of  
270 two of the three native macrophytes than that of the co-introduced invader *M. aquaticum*. As the  
271 native macrophyte species are evolutionarily naïve to the herbivore, it is likely that the native  
272 macrophytes have not evolved strong defences against the invasive snail. On the other hand,  
273 because the invasive macrophyte is native to the same biogeographic region as the invasive  
274 snail, it is likely that the invasive macrophyte has evolved strong defence against the herbivore,  
275 and hence is less palatable to the invasive snail than native macrophytes. In fact, a previous  
276 feeding assay with the invasive snail *P. canaliculata* and ten aquatic macrophyte species that  
277 included *M. aquaticum* found that the invasive snail had low survivorship and growth rate, and  
278 did not reproduce when fed on the invasive macrophyte *M. aquaticum* (Qiu and Kwong 2009). In

279 the previous study, macrophytes with high nutritional contents and low chemical defences (i.e.,  
280 low phenolic content) were more palatable to the invasive snail than macrophytes with low  
281 nutritional content and high chemical defences (Qiu and Kwong 2009). Future studies may test  
282 whether the three native macrophytes that were studied presently differ in nutritional content and  
283 chemical defences from the invasive macrophyte.

284 Herbivory can enhance growth performance of alien plants over native plants by inducing  
285 compensatory growth and enhanced competitive ability of alien plants (Best and Arcese 2009).  
286 Given that invasive plant species often grow faster than native species (van Kleunen et al. 2010),  
287 greater compensatory growth might be expected for the former. Plants can defend against  
288 herbivory through two strategies: resistance (i.e., plant traits that minimize damage from  
289 herbivores, e.g. defence compounds and leaf toughness) and tolerance (i.e., plant traits that  
290 enable a plant to maintain fitness after damage has occurred, e.g., increased photosynthetic and  
291 growth rates) (Strauss and Agrawal 1999, Stowe et al. 2000). Resistance and tolerance are not  
292 necessarily mutually exclusive defence strategies as plant species often deploy both. For instance,  
293 herbivory by two folivores (*Lema daturaphila* and *Epitrix parvula*) selected for plant *Datura*  
294 *stramonium* genotypes with intermediate resistance and high tolerance (Carmona and Fornoni  
295 2013). Separately, the plant *Senecio jacobaea* exhibited both greater resistance to and tolerance  
296 of herbivory in the introduced range than in the native range (Stastny et al. 2005), while native  
297 populations of the invasive grass *Phragmites australis* did not display tolerance-resistance  
298 tradeoff (Croy et al. 2020). A positive association between tolerance and induced chemical  
299 defence was demonstrated in plant *Arabidopsis thaliana* (Mesa et al. 2017). Therefore, our  
300 finding that the invasive macrophyte experienced a lower herbivory by the invasive snail than  
301 native macrophytes likely because that the invasive macrophyte has high resistance.

302 Mutualism between invaders is posited to initiate invasional meltdown by generating  
303 reciprocal, positive population-level responses that amplify invader-specific impacts. These  
304 impacts then facilitate further invasions and accelerate the overall rate of invasion (Parker et al.  
305 1999). Nevertheless, few studies have demonstrated positive population-level effects between  
306 invaders that amplify their impacts (Havel et al. 2015, Braga et al. 2018). Therefore, future  
307 studies may investigate population-level effects of any positive interactions between *M.*  
308 *aquaticum* and *P. canaliculata*.

309 Many empirical studies suggest that nutrient enrichment will promote alien plant invasion  
310 (Davis et al. 2000, Leishman and Thomson 2005, González et al. 2010, Dawson et al. 2012,  
311 Seabloom et al. 2015, Liu et al. 2017). However, in the present study, nutrient enrichment  
312 reduced the proportional above-ground biomass of the invasive macrophyte. It remains unclear  
313 why our results contradict those of several other studies. A plausible explanation for the current  
314 finding may be that because the current test native macrophyte species are also invasive  
315 elsewhere in the world, they have similarly high or higher growth response to nutrient  
316 enrichment than *M. aquaticum*. The native *H. verticillata* is a naturalized species in much of Asia  
317 that has invaded aquatic habitats in the United States (Zhu et al. 2017), Brazil (Sousa 2011) and  
318 South Africa (Coetzee et al. 2009). Similarly, *M. spicatum* is also listed as an invasive plant in  
319 the United States (Moody and Les 2007) and Egypt (Ali and Soltan 2006), while *H. verticillata*  
320 is highly competitive and often dominates the invasive areas and local large plant communities  
321 (Sousa et al. 2009, Hofstra et al. 2010). Although previous studies found that nutrient enrichment  
322 enhanced growth of the invader *M. aquaticum* (Xie et al. 2010, Shen et al. 2019, Zhang et al.  
323 2021), the effect of nutrient enrichment on competitive ability of *M. aquaticum* against native  
324 macrophytes was not investigated. Therefore, it is likely that these native macrophytes have



325 similar or higher competitive ability than *M. aquaticum* under nutrient enrichment.

326 In conclusion, our study suggests that nutrient enrichment in freshwater lakes may slow  
327 down invasion by the invasive macrophyte, while the invasive herbivore may enhance dominance  
328 of the invasive macrophyte in the invaded community. These results broadly support the idea  
329 that co-invasion by alien species that come from the same biogeographic region and possibly  
330 share evolutionary history can be detrimental to recipient native communities. To date, most  
331 documented cases of facilitation of one invader by another invader are from terrestrial habitats  
332 (Braga et al. 2018), and our study aims to help fill the knowledge gap of positive interactions  
333 among invasive species in aquatic habitats. Identification of interaction networks among invasive  
334 species offers opportunities beyond a single-species approach for managing invasive species in  
335 multiply invaded systems (Bull and Courchamp 2009). In the present context, dissolution of  
336 positive interactions between the invasive snail *P. canaliculata* and the invasive macrophyte *M.*  
337 *aquaticum* may mitigate negative impacts of the invasive macrophyte on native macrophyte  
338 communities.

339 **ACKNOWLEDGEMENTS**

340 YL acknowledges funding from the Chinese Academy of Sciences (Y9B7041001). AO  
341 acknowledges funding from the CAS President's International Fellowship Initiative  
342 (2021VBB0004).

343

344 **AUTHOR CONTRIBUTIONS**

345 YL conceived the idea and designed the experiment. YY, FL and YX performed the experiment.  
346 YY and YL analyzed the data. YY, YL and AMO wrote the first draft of the manuscript, with  
347 further inputs from FL and YX.

348

349 **DATA ACCESSIBILITY**

350 Should the manuscript be accepted, the data supporting the results will be archived in Dryad and  
351 the data DOI will be included at the end of the article.

352

353 **REFERENCES**

- 354 Ali, M. M., and M. A. Soltan. 2006. Expansion of *Myriophyllum spicatum* (Eurasian water  
355 milfoil) into Lake Nasser, Egypt: invasive capacity and habitat stability. *Aquatic Botany*  
356 84:239-244.
- 357 Best, R. J., and P. Arcese. 2009. Exotic herbivores directly facilitate the exotic grasses they  
358 graze: mechanisms for an unexpected positive feedback between invaders. *Oecologia*  
359 159:139-150.
- 360 Bobbink, R., K. Hicks, J. Galloway, T. Spranger, R. Alkemade, M. Ashmore, M. Bustamante, S.  
361 Cinderby, E. Davidson, and F. Dentener. 2010. Global assessment of nitrogen deposition  
362 effects on terrestrial plant diversity: a synthesis. *Ecological Applications* 20:30-59.
- 363 Braga, R. R., L. Gómez-Aparicio, T. Heger, J. R. S. Vitule, and J. M. Jeschke. 2018. Structuring  
364 evidence for invasional meltdown: broad support but with biases and gaps. *Biological*  
365 *Invasions* 20:923-936.
- 366 Buckley, Y. M., and J. Catford. 2016. Does the biogeographic origin of species matter?  
367 Ecological effects of native and non-native species and the use of origin to guide  
368 management. *Journal of Ecology* 104:4-17.
- 369 Bull, L. S., and F. Courchamp. 2009. Management of interacting invasives: ecosystem  
370 approaches. *Invasive species management. A handbook of principles and techniques.*  
371 Oxford University Press, Oxford:232-247.
- 372 Callaway, R. M., Z. Kikvidze, and D. Kikodze. 2000. Facilitation by unpalatable weeds may  
373 conserve plant diversity in overgrazed meadows in the Caucasus Mountains. *Oikos*  
374 89:275-282.

- 375 Carlsson, N. O., C. Brönmark, and L.-A. Hansson. 2004. Invading herbivory: the golden apple  
376 snail alters ecosystem functioning in Asian wetlands. *Ecology* 85:1575-1580.
- 377 Carmona, D., and J. Fornoni. 2013. Herbivores can select for mixed defensive strategies in  
378 plants. *New Phytologist* 197:576-585.
- 379 Coetzee, J. A., M. P. Hill, and D. Schlange. 2009. Potential spread of the invasive plant *Hydrilla*  
380 *verticillata* in South Africa based on anthropogenic spread and climate suitability.  
381 *Biological Invasions* 11:801-812.
- 382 Colautti, R. I., A. Ricciardi, I. A. Grigorovich, and H. J. MacIsaac. 2004. Is invasion success  
383 explained by the enemy release hypothesis? *Ecology Letters* 7:721-733.
- 384 Cope, N. J., and M. J. Winterbourn. 2004. Competitive interactions between two successful  
385 molluscan invaders of freshwaters: an experimental study. *Aquatic Ecology* 38:83-91.
- 386 Croy, J. R., L. A. Meyerson, W. J. Allen, G. P. Bhattarai, and J. T. Cronin. 2020. Lineage and  
387 latitudinal variation in *Phragmites australis* tolerance to herbivory: implications for  
388 invasion success. *Oikos* 129:1341-1357.
- 389 Davis, M. A., J. P. Grime, and K. Thompson. 2000. Fluctuating resources in plant communities:  
390 a general theory of invasibility. *Journal of Ecology* 88:528-534.
- 391 Dawson, W., M. Fischer, and M. van Kleunen. 2012. Common and rare plant species respond  
392 differently to fertilisation and competition, whether they are alien or native. *Ecology*  
393 *Letters* 15:873-880.
- 394 Dawson, W., D. Moser, M. van Kleunen, H. Kreft, J. Pergl, P. Pyšek, P. Weigelt, M. Winter, B.  
395 Lenzner, and T. M. Blackburn. 2017. Global hotspots and correlates of alien species  
396 richness across taxonomic groups. *Nature Ecology and Evolution* 1:1-7.

- 397 Funk, J. L., and P. M. Vitousek. 2007. Resource-use efficiency and plant invasion in  
398 low-resource systems. *Nature* 446:1079-1081.
- 399 Gillard, M., G. Thiébaud, C. Deleu, and B. Leroy. 2017. Present and future distribution of three  
400 aquatic plants taxa across the world: decrease in native and increase in invasive ranges.  
401 *Biological Invasions* 19:2159-2170.
- 402 González, A. L., J. S. Kominoski, M. Danger, S. Ishida, N. Iwai, and A. Rubach. 2010. Can  
403 ecological stoichiometry help explain patterns of biological invasions? *Oikos*  
404 119:779-790.
- 405 Green, P. T., D. J. O'Dowd, K. L. Abbott, M. Jeffery, K. Retallick, and R. Mac Nally. 2011.  
406 Invasional meltdown: invader–invader mutualism facilitates a secondary invasion.  
407 *Ecology* 92:1758-1768.
- 408 Grosholz, E. D. 2005. Recent biological invasion may hasten invasional meltdown by  
409 accelerating historical introductions. *Proceedings of the National Academy of Sciences*  
410 102:1088-1091.
- 411 Gurevitch, J., J. A. Morrison, and L. V. Hedges. 2000. The interaction between competition and  
412 predation: a meta-analysis of field experiments. *The American Naturalist* 155:435-453.
- 413 Havel, J. E., K. E. Kovalenko, S. M. Thomaz, S. Amalfitano, and L. B. Kats. 2015. Aquatic  
414 invasive species: challenges for the future. *Hydrobiologia* 750:147-170.
- 415 Hayes, K., R. Joshi, S. C. Thiengo, and R. Cowie. 2008. Out of South America: multiple origins  
416 of non-native apple snails in Asia. *Diversity and Distributions* 14:701-712.
- 417 Hobbs, R. J. 2001. Synergisms among habitat fragmentation, livestock grazing, and biotic  
418 invasions in southwestern Australia. *Conservation Biology* 15:1522-1528.

- 419 Hofstra, D., P. Champion, and J. Clayton. 2010. Predicting invasive success of *Hydrilla*  
420 *verticillata* (Lf) Royle in flowing water. *Hydrobiologia* 656:213-219.
- 421 Johnson, P. T., J. D. Olden, C. T. Solomon, and M. J. Vander Zanden. 2009. Interactions among  
422 invaders: community and ecosystem effects of multiple invasive species in an  
423 experimental aquatic system. *Oecologia* 159:161-170.
- 424 Leishman, M. R., and V. P. Thomson. 2005. Experimental evidence for the effects of additional  
425 water, nutrients and physical disturbance on invasive plants in low fertility Hawkesbury  
426 Sandstone soils, Sydney, Australia. *Journal of Ecology* 93:38-49.
- 427 Li, Z., W. Wang, and Y. Zhang. 2014. Recruitment and herbivory affect spread of invasive  
428 *Spartina alterniflora* in China. *Ecology* 95:1972-1980.
- 429 Liu, Y., A. M. Oduor, Z. Zhang, A. Manea, I. M. Tooth, M. R. Leishman, X. Xu, and M. van  
430 Kleunen. 2017. Do invasive alien plants benefit more from global environmental change  
431 than native plants? *Global Change Biology* 23:3363-3370.
- 432 Lowe, S., M. Browne, S. Boudjelas, and M. De Poorter. 2000. 100 of the world's worst invasive  
433 alien species: a selection from the global invasive species database. Invasive Species  
434 Specialist Group Auckland.
- 435 Mack, R. N., D. Simberloff, W. Mark Lonsdale, H. Evans, M. Clout, and F. A. Bazzaz. 2000.  
436 Biotic invasions: causes, epidemiology, global consequences, and control. *Ecological*  
437 *Applications* 10:689-710.
- 438 Mesa, J. M., D. R. Scholes, J. A. Juvik, and K. N. Paige. 2017. Molecular constraints on  
439 resistance–tolerance trade-offs. *Ecology* 98:2528-2537.

- 440 Moody, M., and D. Les. 2007. Geographic distribution and genotypic composition of invasive  
441 hybrid watermilfoil (*Myriophyllum spicatum* × *M. sibiricum*) populations in North  
442 America. *Biological Invasions* 9:559-570.
- 443 O'Loughlin, L. S., and P. T. Green. 2017. Secondary invasion: When invasion success is  
444 contingent on other invaders altering the properties of recipient ecosystems. *Ecology and*  
445 *Evolution* 7:7628-7637.
- 446 Oduor, A. M., J. M. Gómez, and S. Y. Strauss. 2010. Exotic vertebrate and invertebrate  
447 herbivores differ in their impacts on native and exotic plants: a meta-analysis. *Biological*  
448 *Invasions* 12:407-419.
- 449 Oduor, A. M., H. Long, A. B. Fandohan, J. Liu, and X. Yu. 2018. An invasive plant provides  
450 refuge to native plant species in an intensely grazed ecosystem. *Biological Invasions*  
451 20:2745-2751.
- 452 R Core Team (2020) R: a language and environment for statistical computing. Vienna, Austria:  
453 R Foundation for Statistical Computing. Retrieved from <https://www.R-project.org/>
- 454 Parker, I. M., D. Simberloff, W. Lonsdale, K. Goodell, M. Wonham, P. Kareiva, M. Williamson,  
455 B. Von Holle, P. Moyle, and J. Byers. 1999. Impact: toward a framework for  
456 understanding the ecological effects of invaders. *Biological Invasions* 1:3-19.
- 457 Parker, J. D., D. E. Burkepile, and M. E. Hay. 2006. Opposing effects of native and exotic  
458 herbivores on plant invasions. *Science* 311:1459-1461.
- 459 Qiu, J. W., and K. L. Kwong. 2009. Effects of macrophytes on feeding and life-history traits of  
460 the invasive apple snail *Pomacea canaliculata*. *Freshwater Biology* 54:1720-1730.

- 461 Qi, S. S., Y. J. Liu, Z. C. Dai, L. Y. Wan, D. L. Du, R. T. Ju, J. S. H. Wan, and S. P. Bonser.  
462 (2020). Allelopathy confers an invasive *Wedelia* higher resistance to generalist herbivore  
463 and pathogen enemies over its native congener. *Oecologia* 192:415-423.
- 464 Ricciardi, A. 2001. Facilitative interactions among aquatic invaders: is an "invasional meltdown"  
465 occurring in the Great Lakes? *Canadian Journal of Fisheries and Aquatic Sciences*  
466 58:2513-2525.
- 467 Ricciardi, A., M. F. Hoopes, M. P. Marchetti, and J. L. Lockwood. 2013. Progress toward  
468 understanding the ecological impacts of nonnative species. *Ecological Monographs*  
469 83:263-282.
- 470 Ricciardi, A., J. C. Iacarella, D. C. Aldridge, T. M. Blackburn, J. T. Carlton, J. A. Catford, J. T.  
471 Dick, P. E. Hulme, J. M. Jeschke, and A. M. Liebhold. 2021. Four priority areas to  
472 advance invasion science in the face of rapid environmental change. *Environmental*  
473 *Reviews* 29:119-141.
- 474 Ross, D., C. Johnson, C. Hewitt, and G. M. Ruiz. 2004. Interaction and impacts of two  
475 introduced species on a soft-sediment marine assemblage in SE Tasmania. *Marine*  
476 *Biology* 144:747-756.
- 477 Santamaría, J., F. Tomas, E. Ballesteros, J. M. Ruiz, J. Bernardeau-Esteller, J. Terrados, and E.  
478 Cebrian. 2021. The role of competition and herbivory in biotic resistance against  
479 invaders: a synergistic effect. *Ecology*:e03440.
- 480 Schaffner, U., W. M. Ridenour, V. C. Wolf, T. Bassett, C. Müller, H. Müller-Schärer, S.  
481 Sutherland, C. J. Lortie, and R. M. Callaway. 2011. Plant invasions, generalist  
482 herbivores, and novel defense weapons. *Ecology* 92: 829-835.



- 483 Schirmel, J., M. Bundschuh, M. H. Entling, I. Kowarik, and S. Buchholz. 2016. Impacts of  
484 invasive plants on resident animals across ecosystems, taxa, and feeding types: a global  
485 assessment. *Global Change Biology* 22:594-603.
- 486 Seabloom, E. W., E. T. Borer, Y. M. Buckley, E. E. Cleland, K. F. Davies, J. Firn, W. S.  
487 Harpole, Y. Hautier, E. M. Lind, and A. S. MacDougall. 2015. Plant species' origin  
488 predicts dominance and response to nutrient enrichment and herbivores in global  
489 grasslands. *Nature Communications* 6:1-8.
- 490 Shen, N., H. Yu, S. Yu, D. Yu, and C. Liu. 2019. Does soil nutrient heterogeneity improve the  
491 growth performance and intraspecific competition of the invasive plant *Myriophyllum*  
492 *aquaticum*? *Frontiers in Plant Science* 10:723.
- 493 Simberloff, D., and B. Von Holle. 1999. Positive interactions of nonindigenous species:  
494 invasional meltdown? *Biological Invasions* 1:21-32.
- 495 Sousa, W. 2011. *Hydrilla verticillata* (Hydrocharitaceae), a recent invader threatening Brazil's  
496 freshwater environments: a review of the extent of the problem. *Hydrobiologia* 669:1-20.
- 497 Sousa, W., S. Thomaz, K. Murphy, M. Silveira, and R. Mormul. 2009. Environmental predictors  
498 of the occurrence of exotic *Hydrilla verticillata* (Lf) Royle and native *Egeria najas*  
499 Planch. in a sub-tropical river floodplain: the Upper River Paraná, Brazil. *Hydrobiologia*  
500 632:65-78.
- 501 Stastny, M., U. Schaffner, and E. Elle. 2005. Do vigour of introduced populations and escape  
502 from specialist herbivores contribute to invasiveness? *Journal of Ecology* 93:27-37.

- 503 Stephens, K. L., M. E. Dantzer-Kyer, M. A. Patten, and L. Souza. 2019. Differential responses  
504 to global change of aquatic and terrestrial invasive species: evidences from a meta-  
505 analysis. *Ecosphere* 10:e02680.
- 506 Stowe, K. A., R. J. Marquis, C. G. Hochwender, and E. L. Simms. 2000. The evolutionary  
507 ecology of tolerance to consumer damage. *Annual Review of Ecology and Systematics*  
508 31:565-595.
- 509 Strauss, S. Y., and A. A. Agrawal. 1999. The ecology and evolution of plant tolerance to  
510 herbivory. *Trends in Ecology and Evolution* 14:179-185.
- 511 Strayer, D. L., V. T. Eviner, J. M. Jeschke, and M. L. Pace. 2006. Understanding the long-term  
512 effects of species invasions. *Trends in Ecology and Evolution* 21:645-651.
- 513 Suwa, T., and S. M. Louda. 2012. Combined effects of plant competition and insect herbivory  
514 hinder invasiveness of an introduced thistle. *Oecologia* 169:467-476.
- 515 Tricarico, E., A. O. Junqueira, and D. Dudgeon. 2016. Alien species in aquatic environments: a  
516 selective comparison of coastal and inland waters in tropical and temperate latitudes.  
517 *Aquatic Conservation: Marine and Freshwater Ecosystems* 26:872-891.
- 518 van Kleunen, M., E. Weber, and M. Fischer. 2010. A meta-analysis of trait differences between  
519 invasive and non-invasive plant species. *Ecology Letters* 13:235-245.
- 520 Vilà, M., J. L. Espinar, M. Hejda, P. E. Hulme, V. Jarošík, J. L. Maron, J. Pergl, U. Schaffner, Y.  
521 Sun, and P. Pyšek. 2011. Ecological impacts of invasive alien plants: a meta-analysis of  
522 their effects on species, communities and ecosystems. *Ecology letters* 14:702-708.

- 523 Wang, H., Q. Wang, P. A. Bowler, and W. Xiong. 2016. Invasive aquatic plants in China.  
524 Aquatic Invasions 11.
- 525 Wikelski, M., J. Foufopoulos, H. Vargas, and H. Snell. 2004. Galápagos birds and diseases:  
526 invasive pathogens as threats for island species. *Ecology and Society* 9.
- 527 Xie, D., D. Yu, L. F. Yu, and C. H. Liu. 2010. Asexual propagations of introduced exotic  
528 macrophytes *Elodea nuttallii*, *Myriophyllum aquaticum*, and *M. propinquum* are  
529 improved by nutrient-rich sediments in China. *Hydrobiologia* 655:37-47.
- 530 Zhang, X., H. Yu, H. Yu, C. Liu, S. Fan, and D. Yu. 2021. Highly competitive native aquatic  
531 species could suppress the growth of invasive aquatic species with similar traits.  
532 *Biological Invasions* 23:267-280.
- 533 Zhang, Y., H. Meng, Y. Wang, and Q. He. 2018. Herbivory enhances the resistance of mangrove  
534 forest to cordgrass invasion. *Ecology* 99:1382-1390.
- 535 Zhu, J., X. Xu, Q. Tao, P. Yi, D. Yu, and X. Xu. 2017. High invasion potential of *Hydrilla*  
536 *verticillata* in the Americas predicted using ecological niche modeling combined with  
537 genetic data. *Ecology and Evolution* 7:4982-4990.

538 **FIGURES**

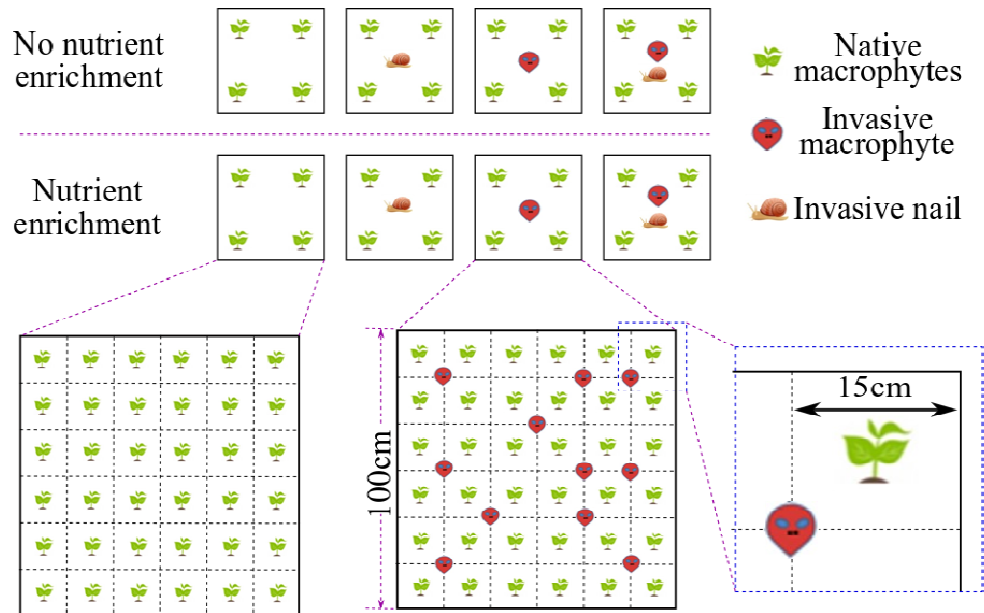

539

540 **Figure 1.** A schematic of an experimental set up to test the main and interactive effects of  
541 co-invasion by an alien snail *Pomacea canaliculata* and an alien macrophyte *Myriophyllum*  
542 *aquaticum* and nutrient enrichment on growth performance of a three-species community of  
543 native macrophytes (*Vallisneria natans*, *Hydrilla verticillata*, and *Myriophyllum spicatum* ) and  
544 the invader *M. aquaticum*. Each grid represents a 1m<sup>3</sup> pond; a total of 128 ponds were used in the  
545 experiment. Grids with a blue outline represent ponds with no-nutrient enrichment treatment,  
546 while grids with a red outline represent ponds with a nutrient-enrichment treatment. Six  
547 similar-sized individuals of *P. canaliculata* were introduced into each pond for a total of 64  
548 ponds, while the other 64 ponds served as a control (no-herbivory). Nutrient-enrichment  
549 treatment was applied to 64 ponds (32 with herbivory and 32 with no-herbivory), while another  
550 64 ponds served as a control and did not receive nutrient enrichment (32 with herbivory and 32  
551 with no-herbivory).

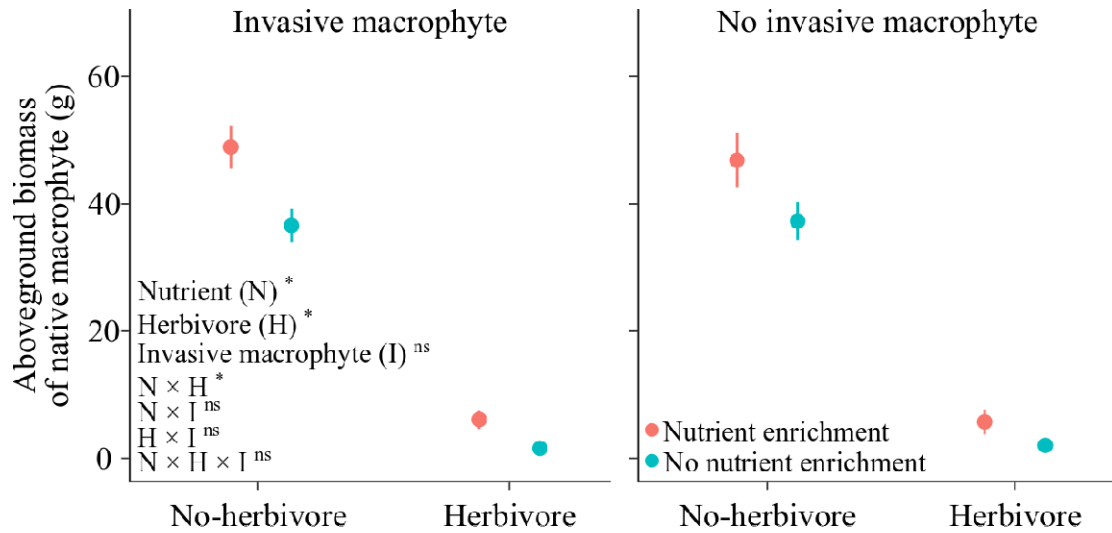

552

553 **Figure 2.** Mean ( $\pm 1$  SE) above-ground biomass of a three-species native macrophyte community.

554 The panels show the effects of invasion by an aquatic macrophyte *Myriophyllum aquaticum*

555 under two levels of nutrient enrichment (enrichment vs. no-enrichment) and herbivory (herbivory

556 vs. no-herbivory) by an invasive snail *Pomacea canaliculata*. The asterisks indicate level of

557 statistical significance: \* denotes  $p < 0.05$ , while <sup>ns</sup> denotes  $p > 0.05$ .

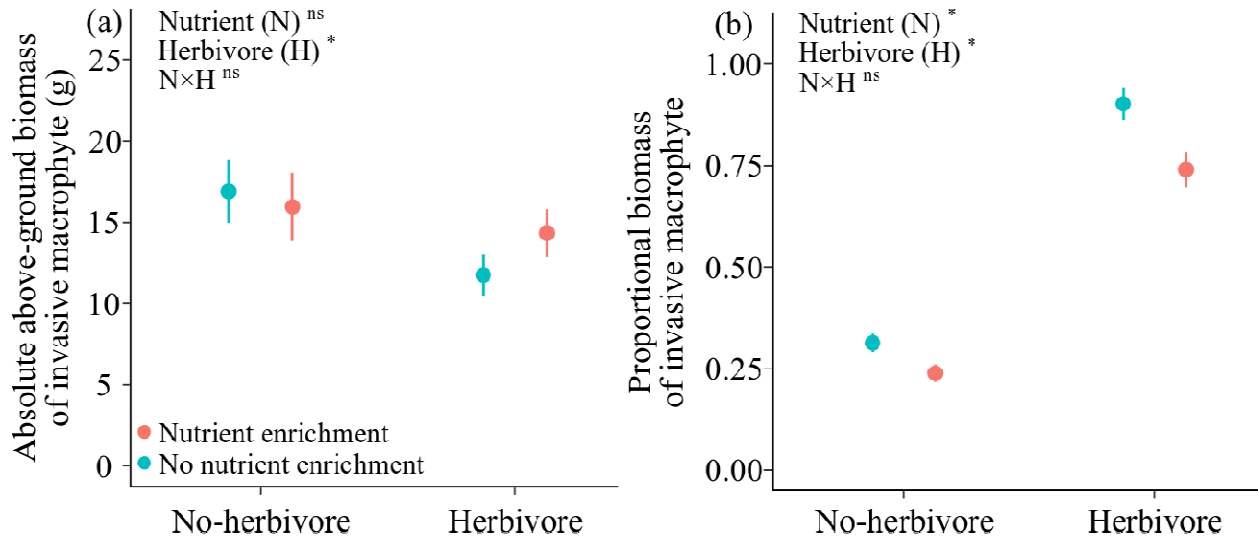

558

559

560

561

562

**Figure 3.** Mean ( $\pm 1$  SE) absolute (a) and proportional (b) above-ground biomass of an invasive macrophyte *Myriophyllum aquaticum* when grown in a three-species native aquatic macrophyte community (*Vallisneria natans*, *Hydrilla verticillata*, and *Myriophyllum spicatum*). The asterisks indicate level of statistical significance: \* denotes  $p < 0.05$ , while <sup>ns</sup> denotes  $p > 0.05$ .

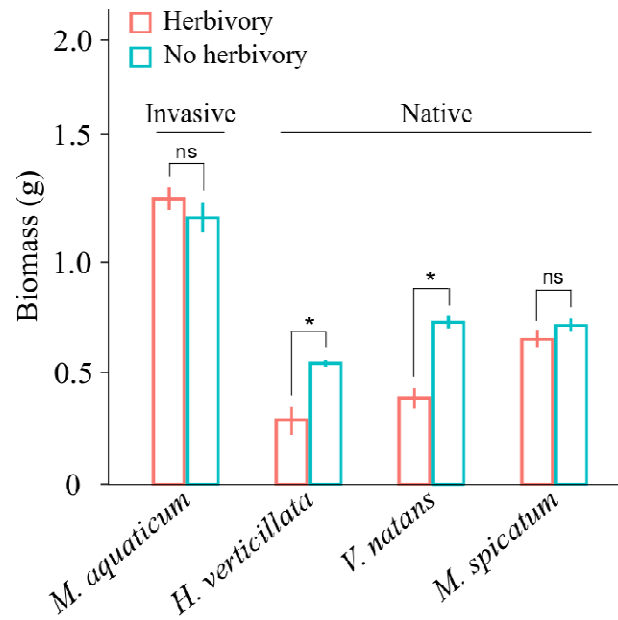

563

564 **Figure 4.** Mean ( $\pm 1$  SE) biomass of three native aquatic macrophytes (*Vallisneria natans*,  
565 *Hydrilla verticillata*, and *Myriophyllum spicatum*) and an invasive macrophyte *Myriophyllum*  
566 *aquaticum* that were subjected to herbivory or not (control) by an invasive aquatic snail *Pomacea*  
567 *canaliculata*. Symbols above bars (\*:  $p < 0.05$ ; ns:  $p > 0.05$ ) show levels of differences between  
568 feeding and no feeding treatment based on the post-hoc analysis with Tukey's Test.

569

570 **Supporting information**

571 **Table S1** Results of a three-way ANOVA that tested for the effects of nutrient enrichment  
572 (enrichment vs. no-enrichment), herbivory by an invasive snail *Pomacea canaliculata* (herbivory  
573 vs. no-herbivory), and presence of an invasive macrophyte *Myriophyllum aquaticum* (present vs.  
574 absent) and their interaction on above-ground biomass of a community three native aquatic  
575 macrophytes (*Vallisneria natans*, *Hydrilla verticillata*, and *Myriophyllum spicatum*). Significant  
576 effects ( $P < 0.05$ ) are shown in bold font.

| Factor                  | Df  | F            | <i>p</i>         |
|-------------------------|-----|--------------|------------------|
| Nutrient enrichment (N) | 1   | 17.03        | <b>&lt;0.001</b> |
| Herbivory (H)           | 1   | 89.18        | <b>&lt;0.001</b> |
| Plant invasion (I)      | 1   | 0.46         | 0.139            |
| N × H                   | 1   | 10.34        | <b>0.011</b>     |
| N × I                   | 1   | 1.97         | 0.419            |
| H × I                   | 1   | 0.37         | 0.703            |
| N × H × I               | 1   | 1.53         | 0.141            |
| Residuals               | Df  | Mean Squares |                  |
|                         | 120 | 24.7         |                  |

577



578 **Table S2.** Results of two-way ANOVAs that tested the effects of nutrient enrichment (enrichment  
 579 vs. no-enrichment), herbivory by an invasive snail *Pomacea canaliculata* (herbivory vs. no-  
 580 herbivory), and interaction between them on absolute above-ground biomass and proportional  
 581 biomass of an invasive macrophyte *Myriophyllum aquaticum* when grown together with a  
 582 community of three native macrophyte species (*Vallisneria natans*, *Hydrilla verticillata*, and  
 583 *Myriophyllum spicatum*). Significant effects ( $P < 0.05$ ) are shown in bold font.

| Factor                  | Absolute above-ground |              |          | Proportional above-ground biomass |              |                  |
|-------------------------|-----------------------|--------------|----------|-----------------------------------|--------------|------------------|
|                         | Df                    | F            | <i>p</i> | Df                                | F            | <i>p</i>         |
| Nutrient enrichment (N) | 1                     | 0.25         | 0.616    | 1                                 | 12.66        | <b>0.001</b>     |
| Herbivory (H)           | 1                     | 3.12         | 0.083    | 1                                 | 212.06       | <b>&lt;0.001</b> |
| N × H                   | 1                     | 1.92         | 0.171    | 1                                 | 0.27         | 0.603            |
| Residuals               | Df                    | Mean Squares |          | Df                                | Mean Squares |                  |
|                         | 57                    | 0.090        |          | 57                                | 0.205        |                  |

584

585 **Table S3.** Results of a two-way ANOVA that tested for the effect of herbivory by an invasive  
586 alien snail *Pomacea canaliculata* on above-ground biomass of an invasive alien macrophyte  
587 *Myriophyllum aquaticum* and three native macrophyte species *Vallisneria natans*, *Hydrilla*  
588 *verticillata*, and *Myriophyllum spicatum*. Species identity of the four macrophytes and herbivory  
589 by the snail were treated as independent variables.

| Factors           | Df | F            | <i>p</i>         |
|-------------------|----|--------------|------------------|
| Species           | 1  | 53.70        | <b>&lt;0.001</b> |
| Feeding           | 1  | 25.29        | <b>&lt;0.001</b> |
| Species × Feeding | 1  | 8.18         | <b>0.002</b>     |
| Residuals         | Df | Mean Squares |                  |
|                   | 16 | 0.027        |                  |

590
